# Supplementary material
Source: PubMed Central journal article supplement (PMC6636356)
Supplement: NIHMS1526412-supplement-1.pdf [file NIHMS1526412-supplement-1.pdf]

**Molecular Cell**

**Supplemental Information**

**The RNA-binding ATPase, Armitage,  
Couples piRNA Amplification in Nuage to  
Phased piRNA Production on Mitochondria**

Daniel Tianfang Ge, Wei Wang, Cindy Tipping, Ildar Gainetdinov,  
Zhiping Weng, Phillip D. Zamore

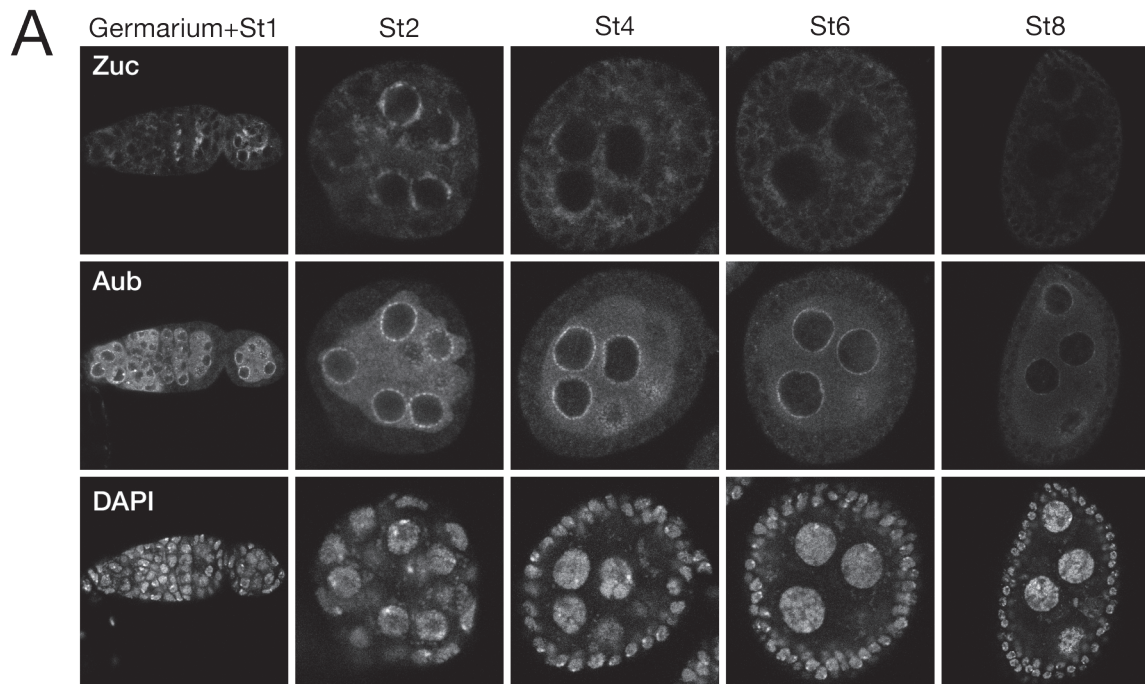

**B** Nuage, mitochondria

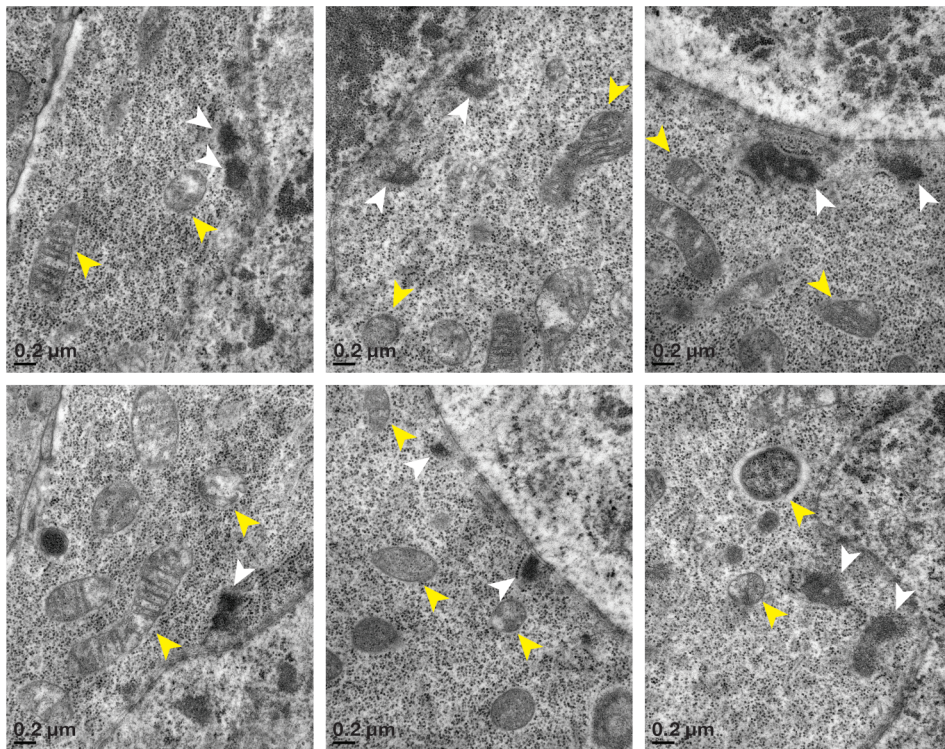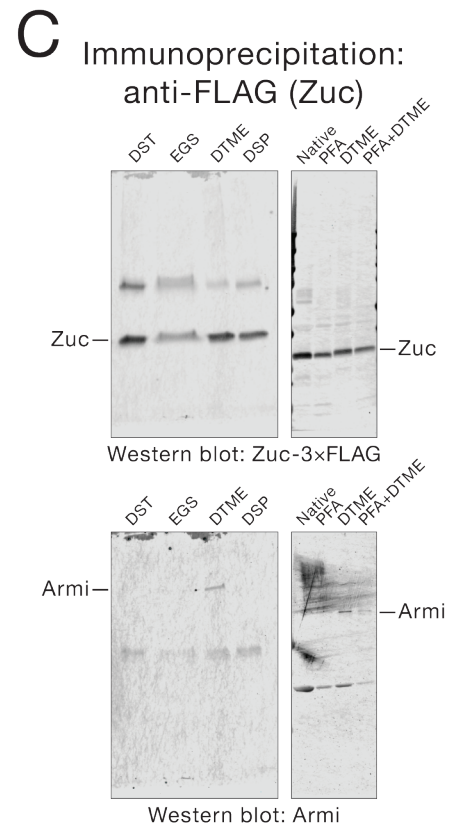

# Wild-type

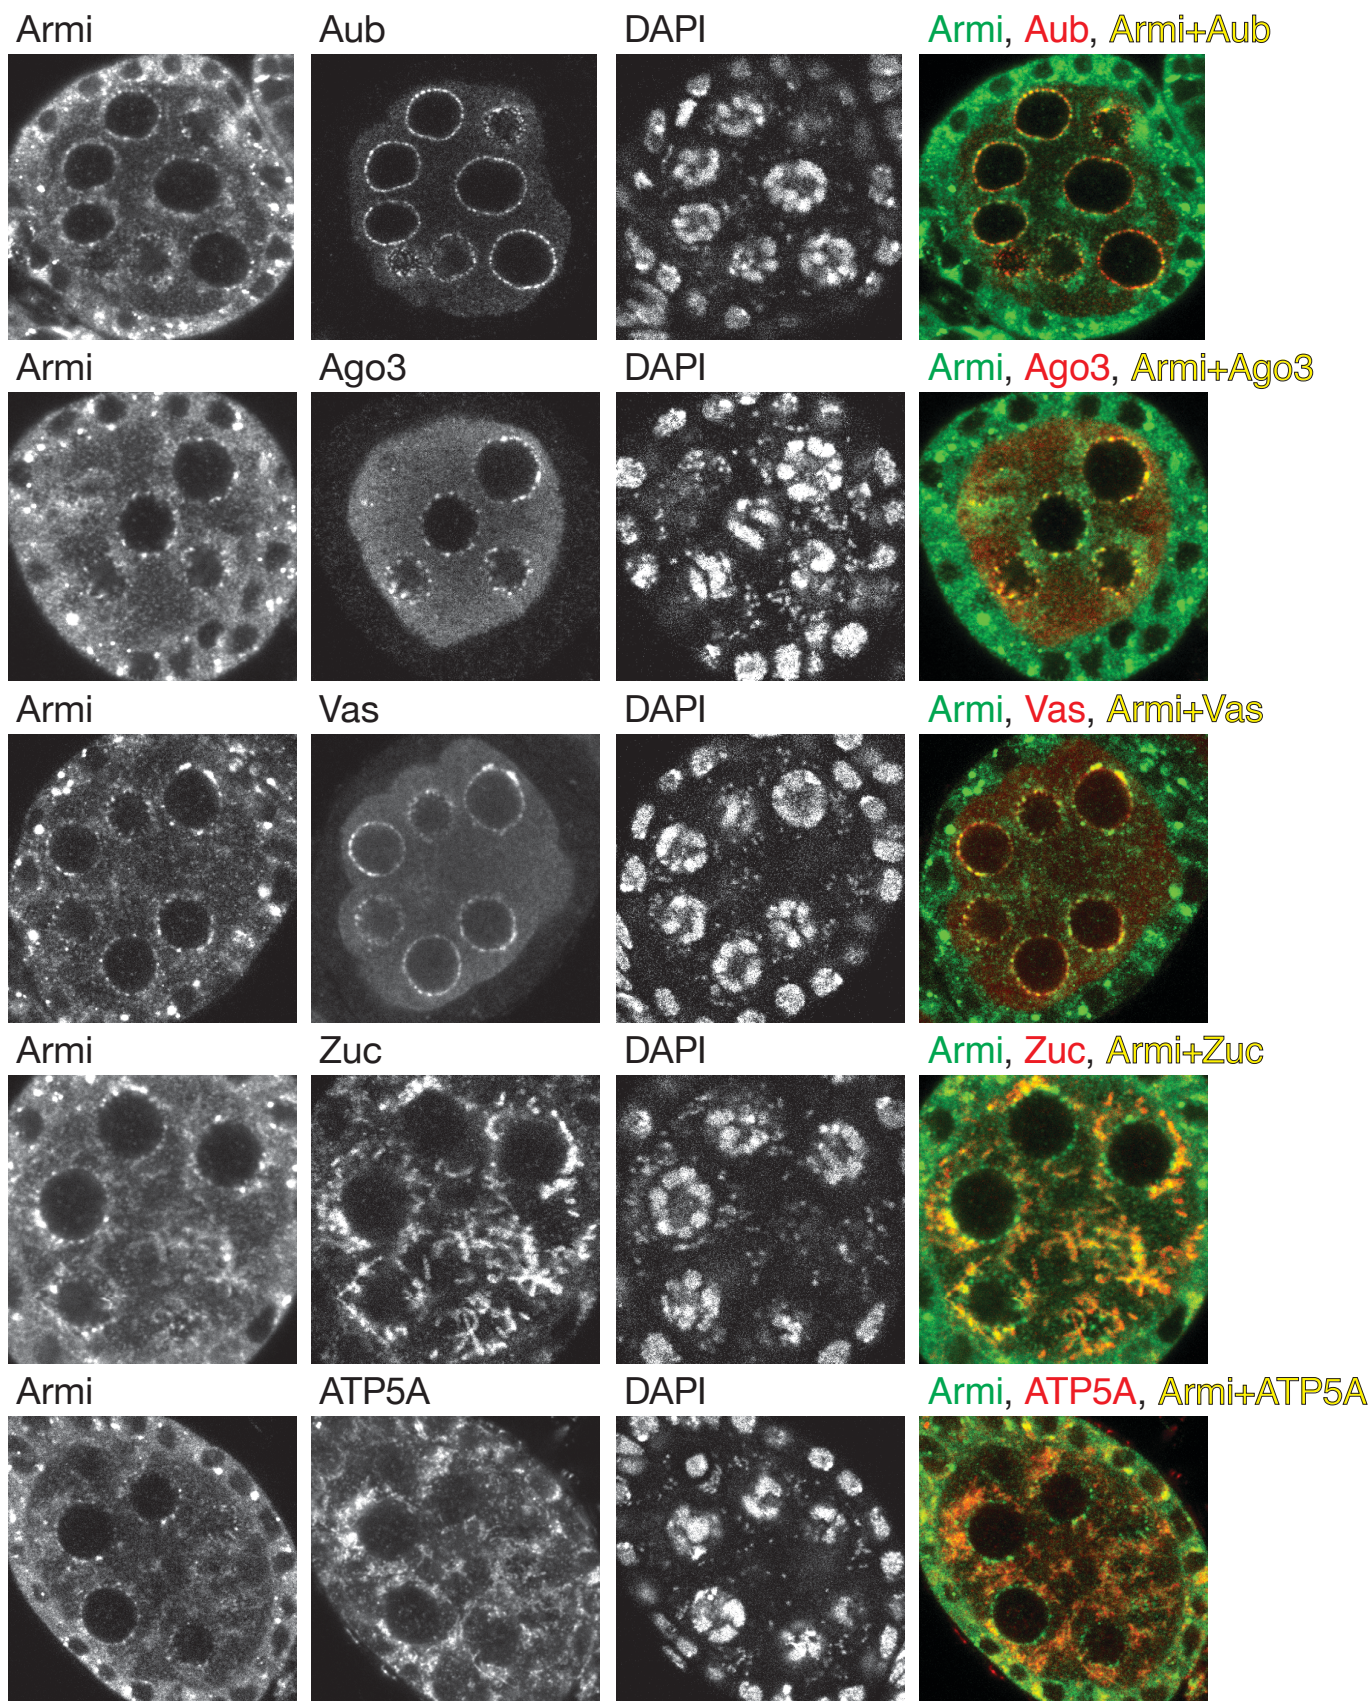

*ZUC<sup>H169Y</sup>*

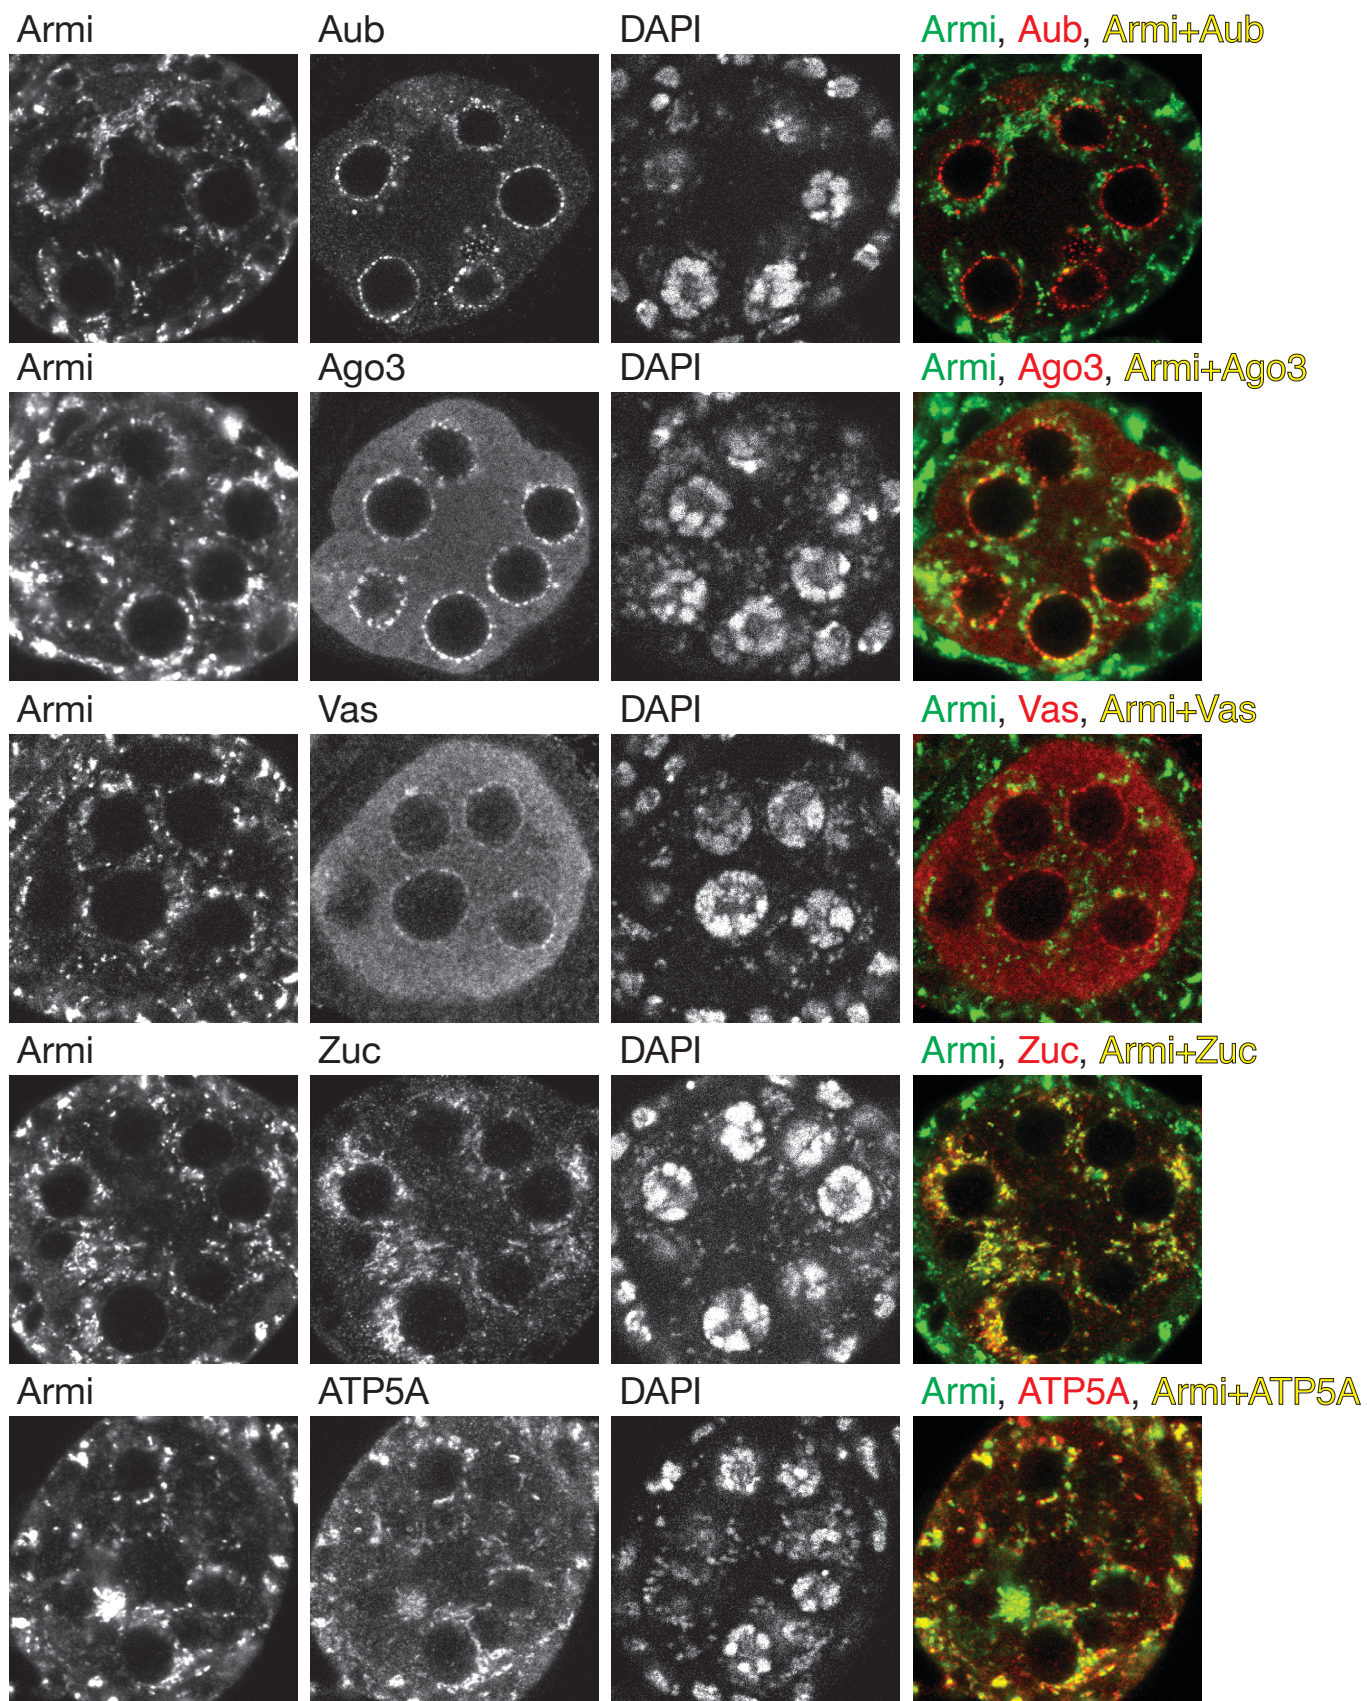

*minotaur*<sup>z3-5967</sup>

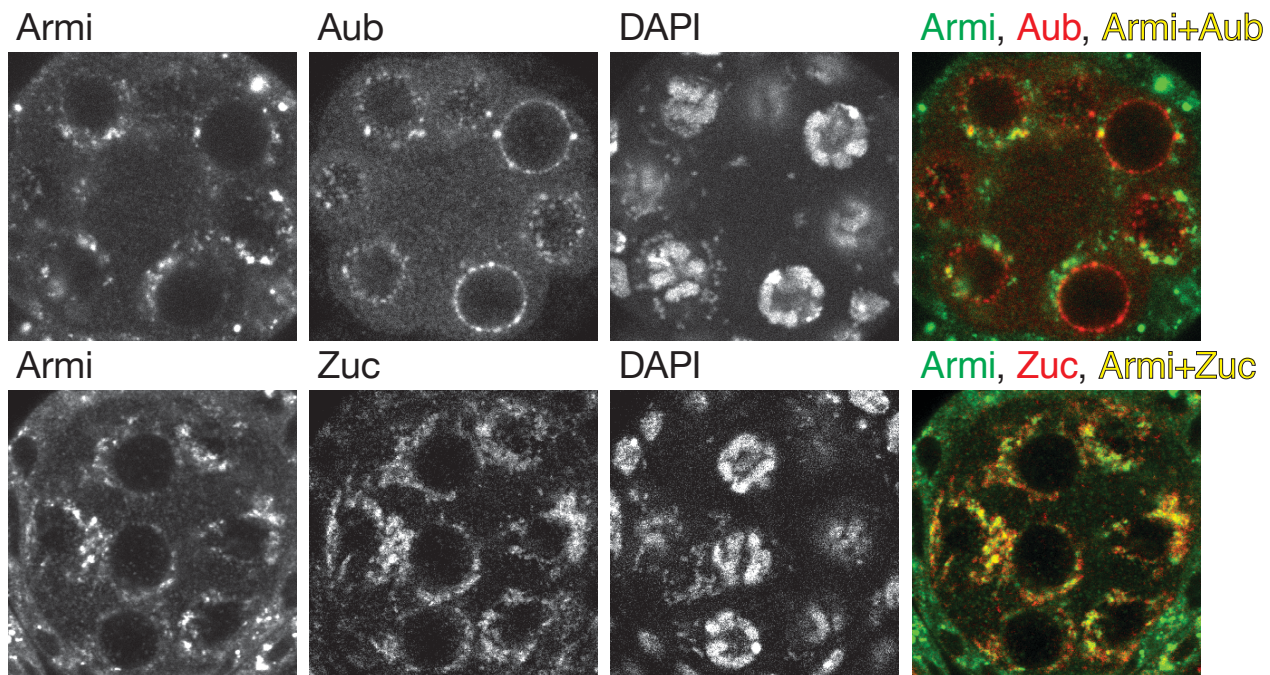

**A**

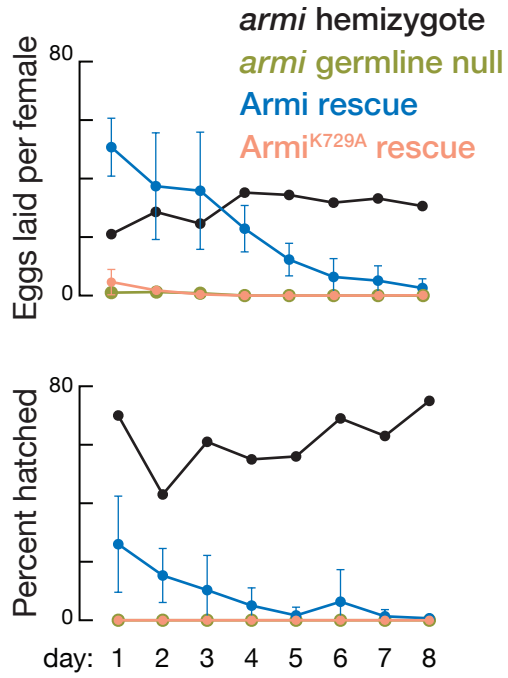

**B**

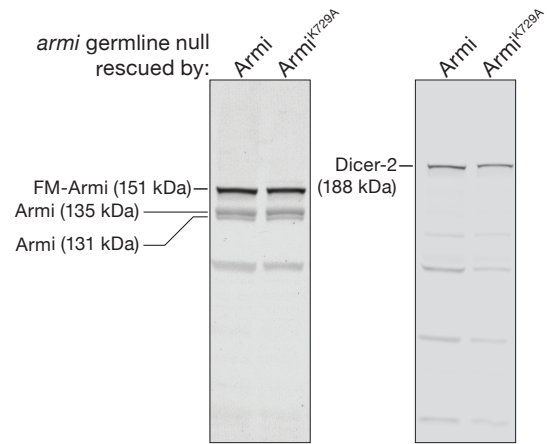

**C**

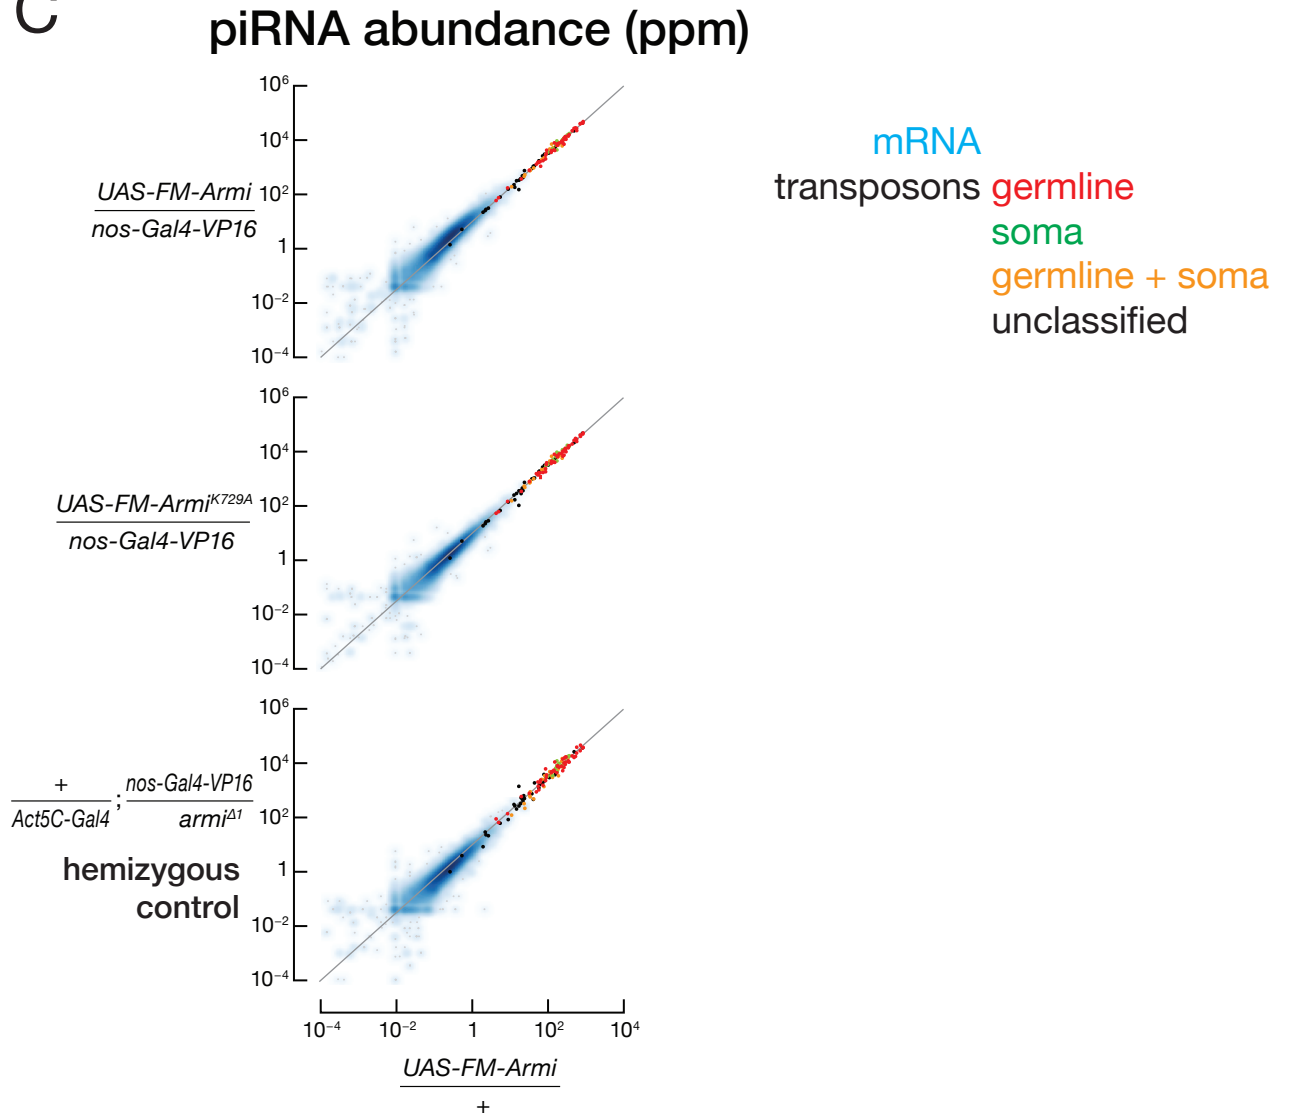

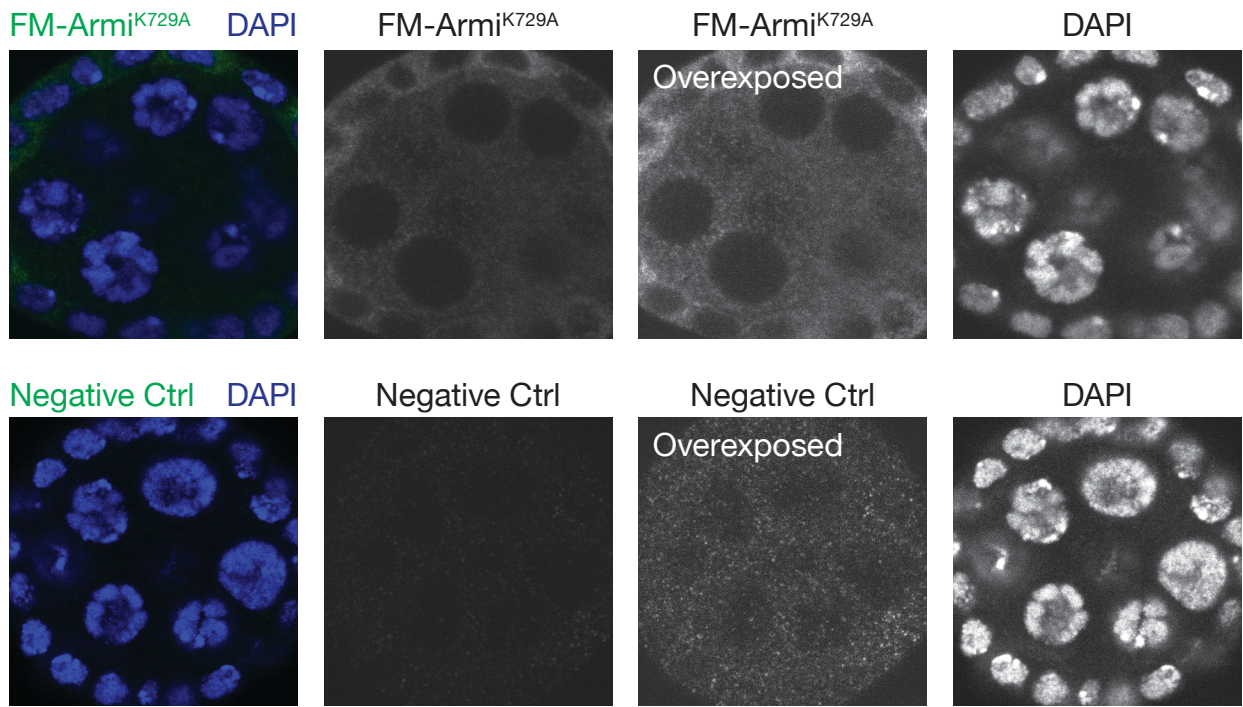

## SUPPLEMENTAL FIGURE LEGENDS

**Figure S1. piRNA biogenesis factors are expressed higher in early stages of oogenesis; nuage and mitochondria are separate in nurse cells; DTME best crosslinks Armi to Zuc. Related to Figure 1.**

(A) Immunofluorescence detection of Zuc-3×FLAG, Aub and nucleic acids (DAPI). St, stage.

(B) Transmission electron microscopy of wild-type stage 3 egg chambers.

(C) Before tissue lysis, *Zuc-3×FLAG* fly ovaries were crosslinked as indicated. Eluate from the FLAG immunoprecipitation was analyzed by Western blotting. PFA, paraformaldehyde; DST, disuccinimidyl tartrate; EGS, ethylene glycol bis(succinimidyl succinate); DSP, dithiobis(succinimidyl propionate); DTME, dithio-bis-maleimidoethane.

**Figure S2. Individual channels of immunofluorescence co-detection of Armi and Aub, Ago3, Vasa, Zuc-3×FLAG or ATP5A in wild-type stage 3 egg chambers. Related to Figure 2.**

**Figure S3. Individual channels of immunofluorescence co-detection of Armi and Aub, Ago3, Vasa, Zuc-3×FLAG or ATP5A in *zuc<sup>H169Y</sup>* stage 3 egg chambers. Related to Figure 2.**

**Figure S4. Individual channels of immunofluorescence co-detection of Armi and Aub or Zuc-3×FLAG in *minotaur<sup>z3-5967</sup>* stage 3 egg chambers. Related to Figure 2.**

**Figure S5. Wild-type Armi, but not Armi<sup>K729A</sup>, rescues the fertility of *armi* germline mutant females; Armi<sup>K729A</sup> abundance is similar to that of Armi; piRNA abundance**



**in *armi* hemizygote flies and in flies expressing transgenic FM-Armi or FM-Armi<sup>K729A</sup>. Related to Figure 4.**

(A) Female fertility test. For UAS-FM-Armi and UAS-FM-Armi<sup>K729A</sup> transgenic flies, error bars show S.D. from three biological replicates.

(B) Western blotting to detect Armi. Dicer-2 provided a loading control.

(C) Scatter plot of the abundance of transposon- or gene-mapping piRNAs from the indicated genotype.

**Figure S6. Armi<sup>K729A</sup> is detected in nurse cell cytoplasm. Related to Figure 5.**

Immunofluorescence detection using anti-FLAG antibody of transgenic FLAG-Myc-Armi<sup>K729A</sup> in *armi* mutant or wild-type germ cells from stage 3 egg chambers. The FLAG fluorescent channel is overexposed to show signal in FLAG-Myc-Armi<sup>K729A</sup>.
